# Supplementary material for: Clinical Effectiveness and Safety of Once-Weekly GLP-1 Receptor Agonist Dulaglutide as Add-On to Metformin or Metformin Plus Insulin Secretagogues in Obesity and Type 2 Diabetes
Source: PubMed Central journal article supplement (PMC7957905; doi:10.3390/jcm10050985), 2021-03-02
Supplement: jcm-10-00985-s001.pdf [file jcm-10-00985-s001.pdf]

## Supplementary Materials

**Table S1.** Longitudinal changes in HbA1c and body weight in patients treated with dulaglutide 1.5mg/once weekly as add-on to MET or MET plus conventional insulin secretagogues.

| <b>Changes</b>  | <b>6 Months<br/>(N = 89)</b> | <b>12 Months<br/>(N = 77)</b> | <b>18 Months<br/>(N = 65)</b> | <b>p Value<br/>(6 vs. 12 months)</b> | <b>p Value<br/>(6 vs. 18 months)</b> |
|-----------------|------------------------------|-------------------------------|-------------------------------|--------------------------------------|--------------------------------------|
| HbA1c, %        | -0.85 (1.17)                 | -0.85 (1.25)                  | -0.75 (1.49)                  | 0.443                                | 0.423                                |
| Body weight, %  | -2.0 (4.3)                   | -1.7 (4.7)                    | -1.3 (4.8)                    | 0.227                                | 0.091                                |
| Body weight, kg | -2.8 (9.8)                   | -1.7 (4.5)                    | -1.4 (4.5)                    | 0.366                                | 0.087                                |

Data are presented as means (SD). Paired data were compared by using the Wilcoxon signed-rank test. Missing values were handled by excluding cases per dependent variable. Longitudinal changes were calculated with respect to baseline values, as absolute (HbA1c) or relative (body weight) percentage differences. MET: metformin; SD: standard deviations.

**Table S2.** Baseline characteristics of frequency-matched groups (N = 54 both) naïve to GLP-1 RA who were treated with dulaglutide (DU) 1.5 mg/once weekly or liraglutide (LIRA) 1.2–1.8mg/once daily as add-on to metformin or metformin plus conventional insulin secretagogues for a minimum of 18 months. Matching criteria included age, gender, T2D duration, degree of glycemc impairment, cardiovascular comorbidities, and background medications.

| Clinical and demographic characteristics         | LIRA (N = 54) |        | DU (N = 54)   |        | p Value |
|--------------------------------------------------|---------------|--------|---------------|--------|---------|
| Female gender, N                                 | 31            | 57.4%  | 31            | 57.4%  | 1.000   |
| Age, yr                                          | 56.7 (6.3)    |        | 58.8 (9.1)    |        | 0.134   |
| T2D duration, yr                                 | 7.4 (5.0)     |        | 7.6 (5.0)     |        | 0.824   |
| T2D duration > 10 yr                             | 16            | 29.6%  | 15            | 27.8%  | 1.000   |
| Hypertension, N                                  | 41            | 75.9%  | 39            | 72.2%  | 0.827   |
| CHD, N                                           | 6             | 11.1%  | 6             | 11.1%  | 1.000   |
| History of stroke/TIA, N                         | 1             | 1.9 %  | 2             | 3.7%   | 1.000   |
| Peripheral arterial disease, N                   | 1             | 1.9%   | 2             | 3.7%   | 1.000   |
| Overweight (BMI ≥ 25–29.9 kg/m <sup>2</sup> ), N | 16            | 29.6%  | 20            | 37.0%  | 0.541   |
| Obesity (BMI ≥ 30 kg/m <sup>2</sup> ), N         | 38            | 70.4%  | 34            | 63.0%  | 0.541   |
| Dyslipidemia, N                                  | 36            | 66.7%  | 35            | 64.8%  | 1.000   |
| Other comorbidities, N                           | 38            | 70.4%  | 40            | 74.1%  | 0.830   |
| Microvascular diabetic complications, N          | 15            | 27.8%  | 13            | 24.1%  | 0.827   |
| Diabetic retinopathy, N                          | 7             | 13.0%  | 5             | 9.3%   | 0.761   |
| Early stage DKD, N                               | 7             | 13.0%  | 5             | 9.3%   | 0.761   |
| Advanced stage DKD, N                            | 1             | 1.9%   | 1             | 1.9%   | 1.000   |
| Diabetic neuropathy, N                           | 2             | 3.7%   | 5             | 9.3%   | 0.437   |
| Weight, kg                                       | 92.9 (17.8)   |        | 92.1 (18.8)   |        | 0.678   |
| BMI, kg/m <sup>2</sup>                           | 33.1 (4.8)    |        | 33.1 (6.2)    |        | 0.239   |
| Systolic BP, mmHg                                | 132.6 (15.8)  |        | 130.2 (14.1)  |        | 0.653   |
| Diastolic BP, mmHg                               | 75.7 (10.3)   |        | 75.5 (11.3)   |        | 0.735   |
| FPG, mg/dL                                       | 169.2 (32.9)  |        | 173.6 (39.2)  |        | 0.770   |
| HbA1c, %                                         | 7.9 (0.9)     |        | 7.8 (0.9)     |        | 0.410   |
| HbA1c ≤ 7%                                       | 8             | 14.8%  | 8             | 14.8%  | 1.000   |
| Creatinine, mg/dL                                | 0.82 (0.22)   |        | 0.87 (0.21)   |        | 0.236   |
| eGFR, mL/min                                     | 98.3 (21.8)   |        | 91.6 (26.9)   |        | 0.070   |
| Total cholesterol, mg/dL                         | 175.4 (31.4)  |        | 188.5 (35.7)  |        | 0.158   |
| LDL-cholesterol, mg/dL                           | 96.7 (32.3)   |        | 109.6 (32.1)  |        | 0.209   |
| HDL-cholesterol, mg/dL                           | 45.2 (7.7)    |        | 48.7 (11.5)   |        | 0.070   |
| Triglycerides, mg/dL                             | 166.3 (64.9)  |        | 168.1 (144.9) |        | 0.127   |
| AST, U/L                                         | 25.4 (10.2)   |        | 24.5 (9.2)    |        | 0.880   |
| ALT, U/L                                         | 30.6 (15.6)   |        | 29.8 (14.8)   |        | 0.915   |
| <b>Background Medications</b>                    |               |        |               |        |         |
| ACE inhibitors, N                                | 17            | 31.5%  | 15            | 27.8%  | 0.833   |
| ARB, N                                           | 18            | 33.3%  | 16            | 29.6%  | 0.835   |
| Calcium blockers, N                              | 13            | 24.1%  | 7             | 13.0%  | 0.214   |
| Beta blockers, N                                 | 15            | 27.8%  | 15            | 27.8%  | 1.000   |
| Diuretics, N                                     | 24            | 44.4%  | 17            | 31.5%  | 0.231   |
| Alpha1 blockers, N                               | 3             | 5.6%   | 3             | 5.6%   | 1.000   |
| Statin, N                                        | 27            | 50.0%  | 28            | 51.9%  | 1.000   |
| Ezetimibe, N                                     | 4             | 7.4%   | 3             | 5.6%   | 1.000   |
| Cardioaspirin, N                                 | 12            | 22.2%  | 13            | 24.1%  | 1.000   |
| MET, N                                           | 54            | 100.0% | 54            | 100.0% | 1.000   |
| MET + sulfonylurea, N                            | 10            | 18.5%  | 7             | 13.0%  | 0.598   |
| MET + glinide, N                                 | 3             | 5.6%   | 4             | 7.4%   | 1.000   |

Data are presented as N and % or means (SD). *p* values were calculated by using the Fisher's exact test or the Mann-Whitney U test, as appropriate. T2D: type 2 diabetes; CHD: coronary heart disease; TIA: transient ischemic attack; DKD: diabetic kidney disease; BMI: body mass index; BP: blood pressure; FPG: fasting plasma glucose; eGFR: estimated glomerular filtration rate; AST: aspartate aminotransferase; ALT: alanine aminotransferase; ACE: angiotensin-converting enzyme; ARB: angiotensin receptor blockers.

**Table S3.** Longitudinal comparisons between matched samples (N = 54) naïve to GLP-1 RA who were treated with dulaglutide (DU) or liraglutide (LIRA) as add-on to metformin or metformin plus conventional insulin secretagogues for a minimum of 18 months.

|                        | 6 Months     |              | 12 Months    |              | 18 Months    |              | <i>p</i> Value<br>(6 Months) | <i>p</i> Value<br>(12 Months) | <i>p</i> Value<br>(18 Months) |
|------------------------|--------------|--------------|--------------|--------------|--------------|--------------|------------------------------|-------------------------------|-------------------------------|
|                        | LIRA         | DU           | LIRA         | DU           | LIRA         | DU           |                              |                               |                               |
| HbA1c, %               | 7.2 (0.9)    | 6.9 (1.0)    | 7.1 (0.9)    | 6.9 (1.0)    | 7.2 (1.0)    | 6.9 (0.9)    | 0.061                        | 0.224                         | 0.088                         |
| FPG, mg/dL             | 145.6 (33.1) | 136.2 (24.7) | 142.2 (37.8) | 139.3 (29.4) | 146.5 (27.2) | 139.6 (25.5) | 0.249                        | 0.922                         | 0.183                         |
| Body weight, kg        | 89.1 (15.9)  | 89.0 (19.0)  | 90.0 (17.5)  | 91.4 (21.0)  | 90.1 (17.7)  | 90.7 (18.6)  | 0.811                        | 0.897                         | 0.955                         |
| BMI, kg/m <sup>2</sup> | 31.8 (3.6)   | 32.0 (6.2)   | 31.7 (3.7)   | 33.6 (9.4)   | 32.0 (3.9)   | 32.6 (6.0)   | 0.299                        | 0.920                         | 0.734                         |
| Systolic BP, mmHg      | 130.2 (12.2) | 129.3 (16.2) | 132.4 (13.7) | 128.8 (11.1) | 132.3 (18.4) | 130.7 (11.0) | 0.544                        | 0.344                         | 0.750                         |
| Diastolic BP, mmHg     | 77.5 (11.3)  | 76.0 (11.4)  | 75.1 (7.8)   | 76.5 (8.2)   | 76.5 (8.8)   | 75.9 (8.7)   | 0.634                        | 0.416                         | 0.985                         |
| Creatinine, mg/dL      | 0.81 (0.29)  | 0.96 (0.10)  | 0.85 (0.24)  | 0.92 (0.27)  | 0.84 (0.22)  | 0.95 (0.20)  | 0.007                        | 0.380                         | 0.031                         |
| eGFR, mL/min           | 96.5 (29.2)  | 78.1 (9.0)   | 92.0 (21.5)  | 86.9 (20.9)  | 95.8 (18.3)  | 82.2 (20.9)  | 0.084                        | 0.558                         | 0.019                         |
| Total chol., mg/dL     | 163.4 (21.5) | 167.5 (31.5) | 165.4 (28.0) | 168.8 (32.8) | 166.6 (31.0) | 169.8 (37.1) | 0.657                        | 0.626                         | 0.602                         |
| LDL-chol., mg/dL       | 87.3 (23.0)  | 97.6 (24.2)  | 86.9 (25.6)  | 93.6 (30.1)  | 89.3 (26.0)  | 83.9 (29.9)  | 0.283                        | 0.574                         | 0.435                         |
| HDL-chol., mg/dL       | 47.4 (11.6)  | 44.9 (13.4)  | 47.3 (12.3)  | 48.9 (9.8)   | 48.7 (48.3)  | 48.3 (12.7)  | 0.251                        | 0.320                         | 0.808                         |
| Triglycerides, mg/dL   | 146.0 (83.6) | 147.9 (65.0) | 153.7 (86.8) | 130.1 (49.8) | 146.6 (69.7) | 157.8 (63.2) | 0.593                        | 0.599                         | 0.354                         |
| AST, U/L               | 27.1 (10.1)  | 26.7 (8.5)   | 27.8 (8.4)   | 25.5 (8.9)   | 35.2 (16.2)  | 29.8 (11.5)  | 0.869                        | 0.333                         | 0.198                         |
| ALT, U/L               | 32.9 (13.5)  | 24.7 (7.6)   | 31.6 (13.5)  | 24.0 (10.5)  | 35.7 (20.7)  | 24.9 (7.2)   | 0.043                        | 0.077                         | 0.032                         |
| <b>Changes</b>         |              |              |              |              |              |              |                              |                               |                               |
| HbA1c, %               | -0.6 (1.1)   | -0.9 (1.3)   | -0.8 (1.0)   | -1.0 (1.3)   | -0.76 (1.1)  | -0.82 (1.5)  | 0.279                        | 0.314                         | 0.714                         |
| Body weight, %         | -3.2 (4.5)   | -3.0 (4.2)   | -3.4 (3.7)   | -2.1 (5.4)   | -3.0 (3.7)   | -1.7 (4.5)   | 0.800                        | 0.249                         | 0.160                         |
| Body weight, kg        | -3.0 (4.3)   | -2.8 (4.2)   | -3.2 (3.5)   | -1.9 (5.6)   | -2.8 (3.4)   | -1.6 (4.2)   | 0.781                        | 0.223                         | 0.163                         |

Data are presented as means (SD). *p* values were calculated by using the Mann-Whitney U test.
